# Supplementary material
Source: HighWire-hosted journal article supplement (http://www.jpn.ca/highwire/filestream/91042/field_highwire_adjunct_files/0/JPN-230090-at-1.pdf)
Supplement: JPN-230090-at-1.pdf [file JPN-230090-at-1.pdf]

**Appendix 1** to Sohn MN, Brown JC, Sharma P, et al. Pharmacological adjuncts and transcranial magnetic stimulation-induced synaptic plasticity: a systematic review. *J Psychiatry Neurosci* 2024.

Copyright © 2024 The Author(s) or their employer(s). To receive this resource in an accessible format, please contact us at [cmajgroup@cmaj.ca](mailto:cmajgroup@cmaj.ca)

DOI: 10.1503/jpn.230090

*Online appendices are unedited and posted as supplied by the authors.*

**Supplemental Figure 1. Search Strategy**

a. MEDLINE

| <input type="checkbox"/> | # ▲ | Searches                                                                                                                              | Results | Type     | Actions                                                | Annotations              |
|--------------------------|-----|---------------------------------------------------------------------------------------------------------------------------------------|---------|----------|--------------------------------------------------------|--------------------------|
| <input type="checkbox"/> | 1   | exp Transcranial Magnetic Stimulation/ or Repetitive Transcranial Magnetic Stimulation.mp.                                            | 16113   | Advanced | <a href="#">Display Results</a> <a href="#">More ▼</a> | <input type="checkbox"/> |
| <input type="checkbox"/> | 2   | limit 1 to (english language and yr="2013 -Current")                                                                                  | 9893    | Advanced | <a href="#">Display Results</a> <a href="#">More ▼</a> | <input type="checkbox"/> |
| <input type="checkbox"/> | 3   | exp Transcranial Magnetic Stimulation/ or TMS.mp.                                                                                     | 22814   | Advanced | <a href="#">Display Results</a> <a href="#">More ▼</a> | <input type="checkbox"/> |
| <input type="checkbox"/> | 4   | limit 3 to (english language and yr="2013 -Current")                                                                                  | 12893   | Advanced | <a href="#">Display Results</a> <a href="#">More ▼</a> | <input type="checkbox"/> |
| <input type="checkbox"/> | 5   | exp Transcranial Magnetic Stimulation/ or rTMS.mp.                                                                                    | 16103   | Advanced | <a href="#">Display Results</a> <a href="#">More ▼</a> | <input type="checkbox"/> |
| <input type="checkbox"/> | 6   | limit 5 to (english language and yr="2013 -Current")                                                                                  | 9878    | Advanced | <a href="#">Display Results</a> <a href="#">More ▼</a> | <input type="checkbox"/> |
| <input type="checkbox"/> | 7   | exp Neuronal Plasticity/ or exp Long-Term Potentiation/ or exp Transcranial Magnetic Stimulation/ or theta-burst stimulation.mp.      | 59957   | Advanced | <a href="#">Display Results</a> <a href="#">More ▼</a> | <input type="checkbox"/> |
| <input type="checkbox"/> | 8   | limit 7 to (english language and yr="2013 -Current")                                                                                  | 26044   | Advanced | <a href="#">Display Results</a> <a href="#">More ▼</a> | <input type="checkbox"/> |
| <input type="checkbox"/> | 9   | cTBS.mp.                                                                                                                              | 750     | Advanced | <a href="#">Display Results</a> <a href="#">More ▼</a> | <input type="checkbox"/> |
| <input type="checkbox"/> | 10  | limit 9 to (english language and yr="2013 -Current")                                                                                  | 582     | Advanced | <a href="#">Display Results</a> <a href="#">More ▼</a> | <input type="checkbox"/> |
| <input type="checkbox"/> | 11  | exp Motor Cortex/ or exp Baclofen/ or iTBS.mp.                                                                                        | 30644   | Advanced | <a href="#">Display Results</a> <a href="#">More ▼</a> | <input type="checkbox"/> |
| <input type="checkbox"/> | 12  | limit 11 to (english language and yr="2013 -Current")                                                                                 | 10327   | Advanced | <a href="#">Display Results</a> <a href="#">More ▼</a> | <input type="checkbox"/> |
| <input type="checkbox"/> | 13  | Long term potentiation.mp. or exp Long-Term Potentiation/                                                                             | 17647   | Advanced | <a href="#">Display Results</a> <a href="#">More ▼</a> | <input type="checkbox"/> |
| <input type="checkbox"/> | 14  | limit 13 to (english language and yr="2013 -Current")                                                                                 | 6607    | Advanced | <a href="#">Display Results</a> <a href="#">More ▼</a> | <input type="checkbox"/> |
| <input type="checkbox"/> | 15  | exp Receptors, N-Methyl-D-Aspartate/ or Long term depression.mp. or exp Long-Term Synaptic Depression/ or exp Long-Term Potentiation/ | 41539   | Advanced | <a href="#">Display Results</a> <a href="#">More ▼</a> | <input type="checkbox"/> |
| <input type="checkbox"/> | 16  | limit 15 to (english language and yr="2013 -Current")                                                                                 | 12390   | Advanced | <a href="#">Display Results</a> <a href="#">More ▼</a> | <input type="checkbox"/> |
| <input type="checkbox"/> | 17  | exp Pharmacology/ or pharmacology.mp. or exp Pharmacology, Clinical/                                                                  | 3458745 | Advanced | <a href="#">Display Results</a> <a href="#">More ▼</a> | <input type="checkbox"/> |
| <input type="checkbox"/> | 18  | limit 17 to (english language and yr="2013 -Current")                                                                                 | 861377  | Advanced | <a href="#">Display Results</a> <a href="#">More ▼</a> | <input type="checkbox"/> |
| <input type="checkbox"/> | 19  | Synaptic Plasticity.mp. or exp Neuronal Plasticity/                                                                                   | 59390   | Advanced | <a href="#">Display Results</a> <a href="#">More ▼</a> | <input type="checkbox"/> |
| <input type="checkbox"/> | 20  | limit 19 to (english language and yr="2013 -Current")                                                                                 | 25621   | Advanced | <a href="#">Display Results</a> <a href="#">More ▼</a> | <input type="checkbox"/> |
| <input type="checkbox"/> | 21  | Facilitation.mp. or exp Neuronal Plasticity/                                                                                          | 79079   | Advanced | <a href="#">Display Results</a> <a href="#">More ▼</a> | <input type="checkbox"/> |
| <input type="checkbox"/> | 22  | limit 21 to (english language and yr="2013 -Current")                                                                                 | 29869   | Advanced | <a href="#">Display Results</a> <a href="#">More ▼</a> | <input type="checkbox"/> |
| <input type="checkbox"/> | 23  | inhibition.mp. or exp Inhibition, Psychological/ or exp Neural Inhibition/                                                            | 1010603 | Advanced | <a href="#">Display Results</a> <a href="#">More ▼</a> | <input type="checkbox"/> |
| <input type="checkbox"/> | 24  | limit 23 to (english language and yr="2013 -Current")                                                                                 | 382445  | Advanced | <a href="#">Display Results</a> <a href="#">More ▼</a> | <input type="checkbox"/> |
| <input type="checkbox"/> | 25  | 1 or 2 or 3 or 4 or 5 or 6 or 7 or 8 or 9 or 10 or 11 or 12                                                                           | 93360   | Advanced | <a href="#">Display Results</a> <a href="#">More ▼</a> | <input type="checkbox"/> |
| <input type="checkbox"/> | 26  | 13 or 14 or 15 or 16 or 19 or 20 or 21 or 22 or 23 or 24                                                                              | 1113522 | Advanced | <a href="#">Display Results</a> <a href="#">More ▼</a> | <input type="checkbox"/> |
| <input type="checkbox"/> | 27  | 17 and 18 and 25 and 26                                                                                                               | 3748    | Advanced | <a href="#">Display Results</a> <a href="#">More ▼</a> | <input type="checkbox"/> |

**Appendix 1** to Sohn MN, Brown JC, Sharma P, et al. Pharmacological adjuncts and transcranial magnetic stimulation-induced synaptic plasticity: a systematic review. *J Psychiatry Neurosci* 2024.

Copyright © 2024 The Author(s) or their employer(s). To receive this resource in an accessible format, please contact us at [cmajgroup@cmaj.ca](mailto:cmajgroup@cmaj.ca)

DOI: 10.1503/jpn.230090

*Online appendices are unedited and posted as supplied by the authors.*

**b. EMBASE**

| ▼ Search History (27) |                                                                                                                                                 |         |          |                                                        | View Save   |
|-----------------------|-------------------------------------------------------------------------------------------------------------------------------------------------|---------|----------|--------------------------------------------------------|-------------|
| #                     | Searches                                                                                                                                        | Results | Type     | Actions                                                | Annotations |
| 1                     | repetitive transcranial magnetic stimulation.mp. or exp transcranial magnetic stimulation/ or exp repetitive transcranial magnetic stimulation/ | 31426   | Advanced | <a href="#">Display Results</a> <a href="#">More ▾</a> |             |
| 2                     | limit 1 to (human and english language and "remove medline records" and yr="2013 -Current")                                                     | 8076    | Advanced | <a href="#">Display Results</a> <a href="#">More ▾</a> |             |
| 3                     | TMS.mp. or exp transcranial magnetic stimulation/                                                                                               | 40459   | Advanced | <a href="#">Display Results</a> <a href="#">More ▾</a> |             |
| 4                     | limit 3 to (human and english language and "remove medline records" and yr="2013 -Current")                                                     | 10074   | Advanced | <a href="#">Display Results</a> <a href="#">More ▾</a> |             |
| 5                     | exp transcranial magnetic stimulation/ or rTMS.mp. or exp repetitive transcranial magnetic stimulation/                                         | 32005   | Advanced | <a href="#">Display Results</a> <a href="#">More ▾</a> |             |
| 6                     | limit 5 to (human and english language and "remove medline records" and yr="2013 -Current")                                                     | 8419    | Advanced | <a href="#">Display Results</a> <a href="#">More ▾</a> |             |
| 7                     | exp long term potentiation/ or theta-burst stimulation.mp.                                                                                      | 24961   | Advanced | <a href="#">Display Results</a> <a href="#">More ▾</a> |             |
| 8                     | limit 7 to (human and english language and "remove medline records" and yr="2013 -Current")                                                     | 2437    | Advanced | <a href="#">Display Results</a> <a href="#">More ▾</a> |             |
| 9                     | cTBS.mp.                                                                                                                                        | 1264    | Advanced | <a href="#">Display Results</a> <a href="#">More ▾</a> |             |
| 10                    | limit 9 to (human and english language and "remove medline records")                                                                            | 512     | Advanced | <a href="#">Display Results</a> <a href="#">More ▾</a> |             |
| 11                    | exp baclofen/ or iTBS.mp.                                                                                                                       | 21505   | Advanced | <a href="#">Display Results</a> <a href="#">More ▾</a> |             |
| 12                    | limit 11 to (human and english language and "remove medline records" and yr="2013 -Current")                                                    | 3385    | Advanced | <a href="#">Display Results</a> <a href="#">More ▾</a> |             |
| 13                    | exp excitatory postsynaptic potential/ or exp long term potentiation/ or long term potentiation.mp. or exp central nervous system/              | 2181311 | Advanced | <a href="#">Display Results</a> <a href="#">More ▾</a> |             |
| 14                    | limit 13 to (human and english language and "remove medline records" and yr="2013 -Current")                                                    | 288377  | Advanced | <a href="#">Display Results</a> <a href="#">More ▾</a> |             |
| 15                    | long term depression.mp. or exp long term depression/                                                                                           | 8668    | Advanced | <a href="#">Display Results</a> <a href="#">More ▾</a> |             |
| 16                    | limit 15 to (human and english language and "remove medline records" and yr="2013 -Current")                                                    | 722     | Advanced | <a href="#">Display Results</a> <a href="#">More ▾</a> |             |
| 17                    | Synaptic Plasticity.mp. or exp nerve cell plasticity/                                                                                           | 93553   | Advanced | <a href="#">Display Results</a> <a href="#">More ▾</a> |             |
| 18                    | limit 17 to (human and english language and "remove medline records" and yr="2013 -Current")                                                    | 10470   | Advanced | <a href="#">Display Results</a> <a href="#">More ▾</a> |             |
| 19                    | Facilitation.mp. or exp facilitation/                                                                                                           | 43092   | Advanced | <a href="#">Display Results</a> <a href="#">More ▾</a> |             |
| 20                    | limit 19 to (human and english language and "remove medline records" and yr="2013 -Current")                                                    | 4571    | Advanced | <a href="#">Display Results</a> <a href="#">More ▾</a> |             |
| 21                    | inhibition.mp. or exp synaptic inhibition/                                                                                                      | 1560564 | Advanced | <a href="#">Display Results</a> <a href="#">More ▾</a> |             |
| 22                    | limit 21 to (human and english language and "remove medline records" and yr="2013 -Current")                                                    | 152502  | Advanced | <a href="#">Display Results</a> <a href="#">More ▾</a> |             |
| 23                    | exp pharmacology/ or Pharmacology.mp.                                                                                                           | 5650639 | Advanced | <a href="#">Display Results</a> <a href="#">More ▾</a> |             |
| 24                    | limit 23 to (human and english language and "remove medline records" and yr="2013 -Current")                                                    | 599891  | Advanced | <a href="#">Display Results</a> <a href="#">More ▾</a> |             |
| 25                    | 1 or 2 or 3 or 4 or 5 or 6 or 7 or 8 or 9 or 10 or 11 or 12                                                                                     | 84080   | Advanced | <a href="#">Display Results</a> <a href="#">More ▾</a> |             |
| 26                    | 13 or 14 or 15 or 16 or 17 or 18 or 19 or 20 or 21 or 22                                                                                        | 3650590 | Advanced | <a href="#">Display Results</a> <a href="#">More ▾</a> |             |
| 27                    | 23 and 24 and 25 and 26                                                                                                                         | 1067    | Advanced | <a href="#">Display Results</a> <a href="#">More ▾</a> |             |

**Appendix 1** to Sohn MN, Brown JC, Sharma P, et al. Pharmacological adjuncts and transcranial magnetic stimulation-induced synaptic plasticity: a systematic review. *J Psychiatry Neurosci* 2024.

Copyright © 2024 The Author(s) or their employer(s). To receive this resource in an accessible format, please contact us at [cmajgroup@cmaj.ca](mailto:cmajgroup@cmaj.ca)

DOI: 10.1503/jpn.230090

*Online appendices are unedited and posted as supplied by the authors.*

**c. PsycINFO**

| ▼ Search History (27)    |            |                                                                                                                                                                      |        |          | View                   | Save                     |  |
|--------------------------|------------|----------------------------------------------------------------------------------------------------------------------------------------------------------------------|--------|----------|------------------------|--------------------------|--|
| #                        | ▲ Searches | Results                                                                                                                                                              | Type   | Actions  | Annotations            |                          |  |
| <input type="checkbox"/> | 1          | repetitive transcranial magnetic stimulation.mp. or exp Transcranial Magnetic Stimulation/                                                                           | 10287  | Advanced | Display Results More ▼ | <input type="checkbox"/> |  |
| <input type="checkbox"/> | 2          | limit 1 to yr="2013 -Current"                                                                                                                                        | 6525   | Advanced | Display Results More ▼ | <input type="checkbox"/> |  |
| <input type="checkbox"/> | 3          | exp Somatosensory Evoked Potentials/ or exp Motor Cortex/ or exp Transcranial Magnetic Stimulation/ or exp Evoked Potentials/ or exp Cerebral Cortex/ or TMS.mp.     | 198771 | Advanced | Display Results More ▼ | <input type="checkbox"/> |  |
| <input type="checkbox"/> | 4          | limit 3 to yr="2013 -Current"                                                                                                                                        | 82572  | Advanced | Display Results More ▼ | <input type="checkbox"/> |  |
| <input type="checkbox"/> | 5          | rTMS.mp.                                                                                                                                                             | 3759   | Advanced | Display Results More ▼ | <input type="checkbox"/> |  |
| <input type="checkbox"/> | 6          | limit 5 to yr="2013 -Current"                                                                                                                                        | 2274   | Advanced | Display Results More ▼ | <input type="checkbox"/> |  |
| <input type="checkbox"/> | 7          | exp Neural Plasticity/ or exp Transcranial Magnetic Stimulation/ or exp Long-term Potentiation/ or theta-burst stimulation.mp.                                       | 30185  | Advanced | Display Results More ▼ | <input type="checkbox"/> |  |
| <input type="checkbox"/> | 8          | limit 7 to yr="2013 -Current"                                                                                                                                        | 16008  | Advanced | Display Results More ▼ | <input type="checkbox"/> |  |
| <input type="checkbox"/> | 9          | ITBS.mp.                                                                                                                                                             | 537    | Advanced | Display Results More ▼ | <input type="checkbox"/> |  |
| <input type="checkbox"/> | 10         | limit 9 to yr="2013 -Current"                                                                                                                                        | 329    | Advanced | Display Results More ▼ | <input type="checkbox"/> |  |
| <input type="checkbox"/> | 11         | cTBS.mp.                                                                                                                                                             | 473    | Advanced | Display Results More ▼ | <input type="checkbox"/> |  |
| <input type="checkbox"/> | 12         | limit 11 to yr="2013 -Current"                                                                                                                                       | 318    | Advanced | Display Results More ▼ | <input type="checkbox"/> |  |
| <input type="checkbox"/> | 13         | exp Long-term Potentiation/ or exp Long-term Depression (Neuronal)/ or exp Synaptic Plasticity/ or exp Neural Plasticity/ or long-term depression.mp. or exp Memory/ | 156161 | Advanced | Display Results More ▼ | <input type="checkbox"/> |  |
| <input type="checkbox"/> | 14         | limit 13 to yr="2013 -Current"                                                                                                                                       | 59392  | Advanced | Display Results More ▼ | <input type="checkbox"/> |  |
| <input type="checkbox"/> | 15         | long-term potentiation.mp. or exp Long-term Potentiation/                                                                                                            | 7481   | Advanced | Display Results More ▼ | <input type="checkbox"/> |  |
| <input type="checkbox"/> | 16         | limit 15 to yr="2013 -Current"                                                                                                                                       | 2927   | Advanced | Display Results More ▼ | <input type="checkbox"/> |  |
| <input type="checkbox"/> | 17         | Synaptic plasticity.mp. or exp Synaptic Plasticity/                                                                                                                  | 13025  | Advanced | Display Results More ▼ | <input type="checkbox"/> |  |
| <input type="checkbox"/> | 18         | limit 17 to yr="2013 -Current"                                                                                                                                       | 6908   | Advanced | Display Results More ▼ | <input type="checkbox"/> |  |
| <input type="checkbox"/> | 19         | exp Learning/ or Facilitation.mp.                                                                                                                                    | 319248 | Advanced | Display Results More ▼ | <input type="checkbox"/> |  |
| <input type="checkbox"/> | 20         | limit 19 to yr="2013 -Current"                                                                                                                                       | 104906 | Advanced | Display Results More ▼ | <input type="checkbox"/> |  |
| <input type="checkbox"/> | 21         | exp Neural Inhibition/ or exp Behavioral Inhibition/ or exp Latent Inhibition/ or inhibition.mp.                                                                     | 83903  | Advanced | Display Results More ▼ | <input type="checkbox"/> |  |
| <input type="checkbox"/> | 22         | limit 21 to yr="2013 -Current"                                                                                                                                       | 31755  | Advanced | Display Results More ▼ | <input type="checkbox"/> |  |
| <input type="checkbox"/> | 23         | pharmacology.mp. or exp Pharmacology/                                                                                                                                | 30373  | Advanced | Display Results More ▼ | <input type="checkbox"/> |  |
| <input type="checkbox"/> | 24         | limit 23 to yr="2013 -Current"                                                                                                                                       | 9920   | Advanced | Display Results More ▼ | <input type="checkbox"/> |  |
| <input type="checkbox"/> | 25         | 1 or 2 or 3 or 4 or 5 or 6 or 7 or 8 or 9 or 10 or 11 or 12                                                                                                          | 211353 | Advanced | Display Results More ▼ | <input type="checkbox"/> |  |
| <input type="checkbox"/> | 26         | 13 or 14 or 15 or 16 or 17 or 18 or 19 or 20 or 21 or 22                                                                                                             | 499477 | Advanced | Display Results More ▼ | <input type="checkbox"/> |  |
| <input type="checkbox"/> | 27         | 23 and 24 and 25                                                                                                                                                     | 580    | Advanced | Display Results More ▼ | <input type="checkbox"/> |  |

**Appendix 1** to Sohn MN, Brown JC, Sharma P, et al. Pharmacological adjuncts and transcranial magnetic stimulation-induced synaptic plasticity: a systematic review. *J Psychiatry Neurosci* 2024.

Copyright © 2024 The Author(s) or their employer(s). To receive this resource in an accessible format, please contact us at [cmaigroup@cmaij.ca](mailto:cmaigroup@cmaij.ca)

DOI: 10.1503/jpn.230090

*Online appendices are unedited and posted as supplied by the authors.*

## Supplemental Figure 2. Risk of Bias Assessment

### a. Crossover Studies ( $k=30$ )

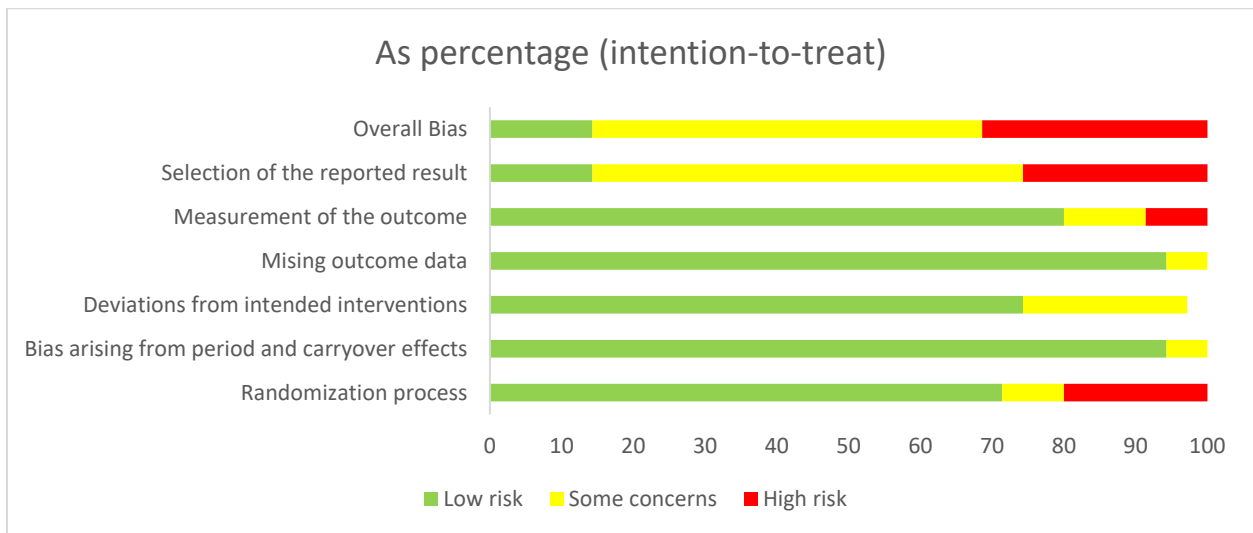

### b. Randomized Group Comparisons ( $k=4$ )

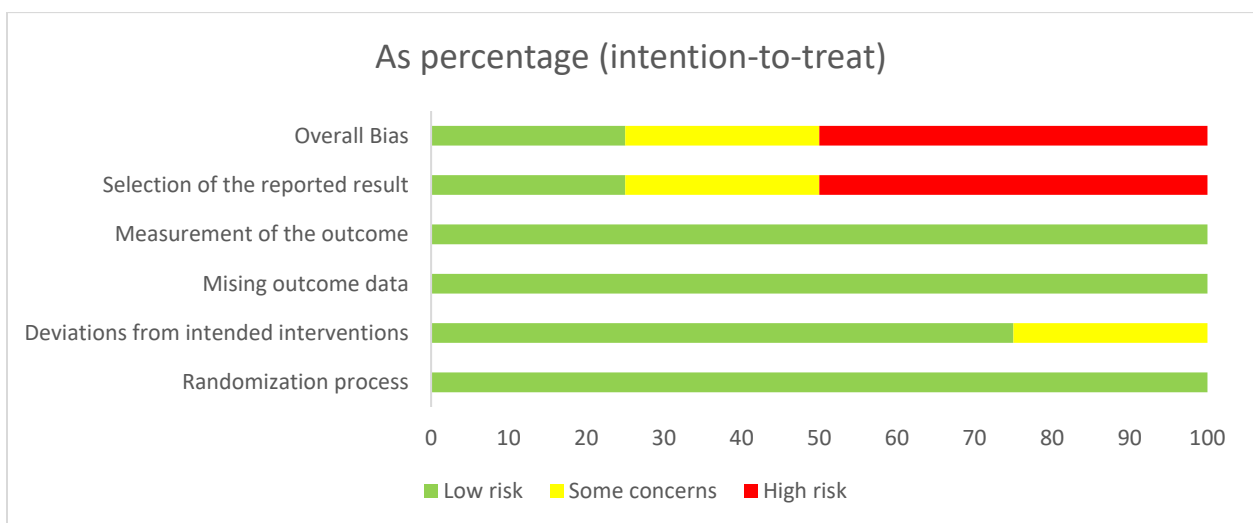

**Appendix 1** to Sohn MN, Brown JC, Sharma P, et al. Pharmacological adjuncts and transcranial magnetic stimulation-induced synaptic plasticity: a systematic review. *J Psychiatry Neurosci* 2024.

Copyright © 2024 The Author(s) or their employer(s). To receive this resource in an accessible format, please contact us at [cmaigroup@cmai.ca](mailto:cmaigroup@cmai.ca)

DOI: 10.1503/jpn.230090

*Online appendices are unedited and posted as supplied by the authors.*

**c. Non-Randomized Studies (k=2)**

| Author Year     | Confounding | Selection | Deviation from intervention | Missing Data | Outcome Measurement | Reported Results | Overall  |
|-----------------|-------------|-----------|-----------------------------|--------------|---------------------|------------------|----------|
| Martorana 2014  | Low         | Low       | Low                         | Low          | Moderate            | Moderate         | Moderate |
| Fitzgerald 2004 | Moderate    | Low       | Low                         | Low          | Moderate            | Moderate         | Moderate |
